# Supplementary material for: The Effect of Oral Adenosine Triphosphate (ATP) Supplementation on Anaerobic Exercise in Healthy Resistance-Trained Individuals: A Systematic Review and Meta-Analysis
Source: MDPI journal article supplement (doi:10.3390/sports12030082), 2024-03-14
Supplement: s1 [file s1]

**Supplementary Table S2.** Methodological quality of the studies included in the review according to the Physiotherapy Evidence Database (PEDro) scale.

| <i>Referencia</i>                              | <i>ítems scale PEDro</i> |   |   |   |   |   |   |   |   |    |    | <i>Quality</i> |
|------------------------------------------------|--------------------------|---|---|---|---|---|---|---|---|----|----|----------------|
|                                                | 1                        | 2 | 3 | 4 | 5 | 6 | 7 | 8 | 9 | 10 | 11 |                |
| <i>Jordán et al. (2004)</i>                    | +                        | + | + | - | + | + | + | + | + | +  | -  | High           |
| <i>Wilson et al. (2013)</i>                    | +                        | + | + | + | + | + | + | + | + | +  | -  | High           |
| <i>Purpura et al. (2017)</i>                   | +                        | + | + | + | + | + | + | + | + | +  | +  | High           |
| <i>Freitas et al. (2019)</i>                   | +                        | + | + | - | + | + | + | + | + | +  | +  | High           |
| <i>Dos Santos Nunes de Moura et al. (2021)</i> | +                        | + | + | - | + | + | + | + | + | +  | -  | High           |

(+) indicates that it meets the criteria; (-) indicates that it does not meet the criteria.
