# Supplementary material for: The Effect of Oral Adenosine Triphosphate (ATP) Supplementation on Anaerobic Exercise in Healthy Resistance-Trained Individuals: A Systematic Review and Meta-Analysis
Source: MDPI journal article supplement (doi:10.3390/sports12030082), 2024-03-14
Supplement: s1 [file s1]

**Supplementary Table S1.** Summary of risk of bias: authors' judgements about each risk of bias item for all included studies.

| Risk of bias item                      | Jordan et al.<br>(2004) | Wilson et al.<br>(2013) | Purpura<br>et al.<br>(2017) | Freitas et al.<br>(2019) | Dos Santos Nunes<br>de Moura et al.<br>(2021) |
|----------------------------------------|-------------------------|-------------------------|-----------------------------|--------------------------|-----------------------------------------------|
| Random sequence generation             | -+                      | -+                      | -+                          | -+                       | ++                                            |
| Allocation concealment                 | -+                      | -+                      | -+                          | -+                       | ++                                            |
| Blinding of participants and personnel | -+                      | ++                      | -+                          | ++                       | ++                                            |
| Blinding of outcome assessment         | ++                      | ++                      | --                          | --                       | --                                            |
| Incomplete outcome data                | ++                      | ++                      | --                          | ++                       | ++                                            |
| Selective reporting                    | ++                      | ++                      | --                          | ++                       | ++                                            |
| Other bias                             | --                      | --                      | --                          | --                       | --                                            |

(++) indicate low risk of bias; (-+) indicate unknown risk of bias; (--) indicate high risk of bias.
