# Supplementary material for: The Effect of Oral Adenosine Triphosphate (ATP) Supplementation on Anaerobic Exercise in Healthy Resistance-Trained Individuals: A Systematic Review and Meta-Analysis
Source: Sports (Basel). 2024 Mar 14;12(3):82. doi: 10.3390/sports12030082 (PMC10975403; doi:10.3390/sports12030082)
Supplement: Supplementary file 1 [file sports-12-00082-s001.zip]

Archive with 6 entries (6 files):
- Supplementary Figure S1.tiff
- Supplementary Figure S2.tiff
- Supplementary Figure S3.tiff
- Supplementary Table S1.pdf
- Supplementary Table S2.pdf
- Supplementary Table S3.pdf
